# Supplementary material for: Carbazole Alkaloids from Clausena anisum-olens: Isolation, Characterization, and Anti-HIV Evaluation
Source: PubMed Central journal article supplement (PMC6983056; doi:10.3390/molecules25010099), 2019-12-26
Supplement: molecules-25-00099-s001.pdf [file molecules-25-00099-s001.pdf]

# Carbazole alkaloids from *Clausena anisum-olens*: isolation, characterization and anti-HIV evaluation

Jing-Hua Yang<sup>1,†</sup>, Xin-Yi Wang<sup>2,†</sup>, Yi-Ping Zhou<sup>3</sup>, Rong Lu<sup>1</sup>, Chin-Ho Chen<sup>4</sup>, Meng-Han Zhang<sup>5</sup>, Yung-Yi Cheng<sup>5,6</sup>, Susan L. Morris-Natschke<sup>5</sup>, Kuo-Hsiung Lee<sup>5,6,\*</sup> and Yun-Song Wang<sup>1,\*</sup>

- <sup>1</sup> Key Laboratory of Medicinal Chemistry for Natural Resource, Ministry of Education, School of Chemical Science and Technology, Yunnan University, Kunming 650091, China
- <sup>2</sup> The High School Affiliated to Yunnan Normal University, Kunming 650106, China
- <sup>3</sup> School of Pharmaceutical Sciences & Yunnan Key Laboratory of Pharmacology for Natural Products, Kunming Medical University, Kunming 650500, China
- <sup>4</sup> Surgical Science, Department of Surgery, Duke University Medical Center, Durham, NC, 27710, USA
- <sup>5</sup> Natural Products Research Laboratories, UNC Eshelman School of Pharmacy, University of North Carolina, Chapel Hill, NC, 27599, USA
- <sup>6</sup> Chinese Medicine Research and Development Center, China Medical University and Hospital, Taichung 40402, Taiwan

## *List of Figures*

- Figure S1. <sup>1</sup>H NMR spectrum of **1** in CDCl<sub>3</sub>
- Figure S2. <sup>13</sup>C NMR and DEPT spectra of **1** in CDCl<sub>3</sub>
- Figure S3. HSQC spectrum of **1** in CDCl<sub>3</sub>
- Figure S4. HMBC spectrum of **1** in CDCl<sub>3</sub>
- Figure S5. <sup>1</sup>H-<sup>1</sup>H COSY spectrum of **1** in CDCl<sub>3</sub>
- Figure S6. ROESY spectrum of **1** in CDCl<sub>3</sub>
- Figure S7. HRESIMS spectrum of **1**
- Figure S8. <sup>1</sup>H NMR spectrum of **2** in acetone-*d*<sub>6</sub>
- Figure S9. <sup>13</sup>C NMR and DEPT spectra of **2** in acetone-*d*<sub>6</sub>
- Figure S10. HSQC spectrum of **2** in acetone-*d*<sub>6</sub>
- Figure S11. HMBC spectrum of **2** in acetone-*d*<sub>6</sub>
- Figure S12. <sup>1</sup>H-<sup>1</sup>H COSY spectrum of **2** in acetone-*d*<sub>6</sub>
- Figure S13. ROESY spectrum of **2** in acetone-*d*<sub>6</sub>
- Figure S14. HRESIMS spectrum of **2**

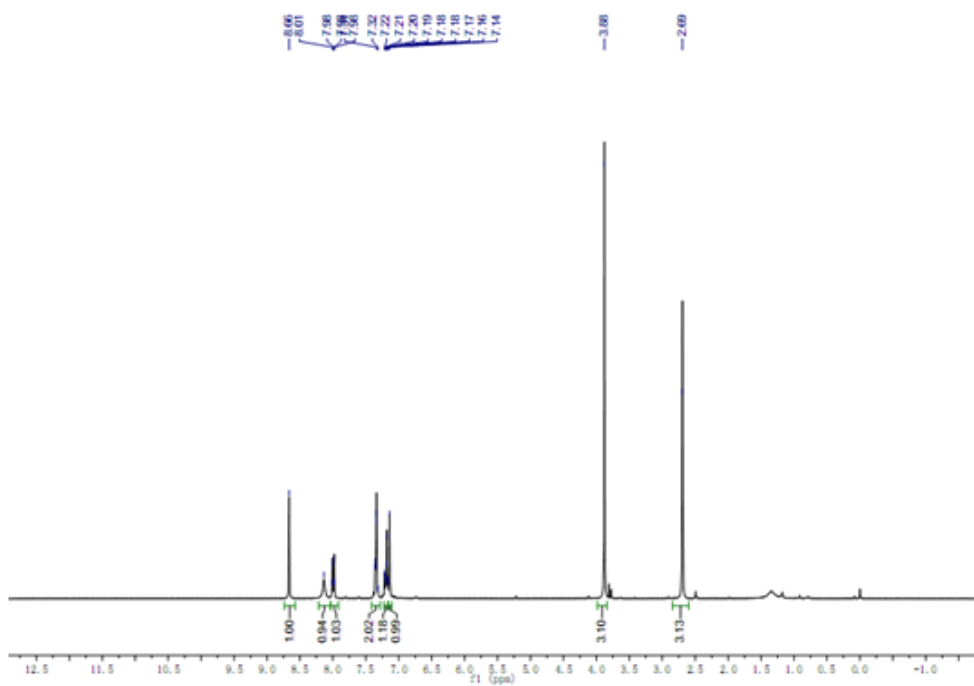

Figure S1.  $^1\text{H}$  NMR spectrum of **1** in  $\text{CDCl}_3$

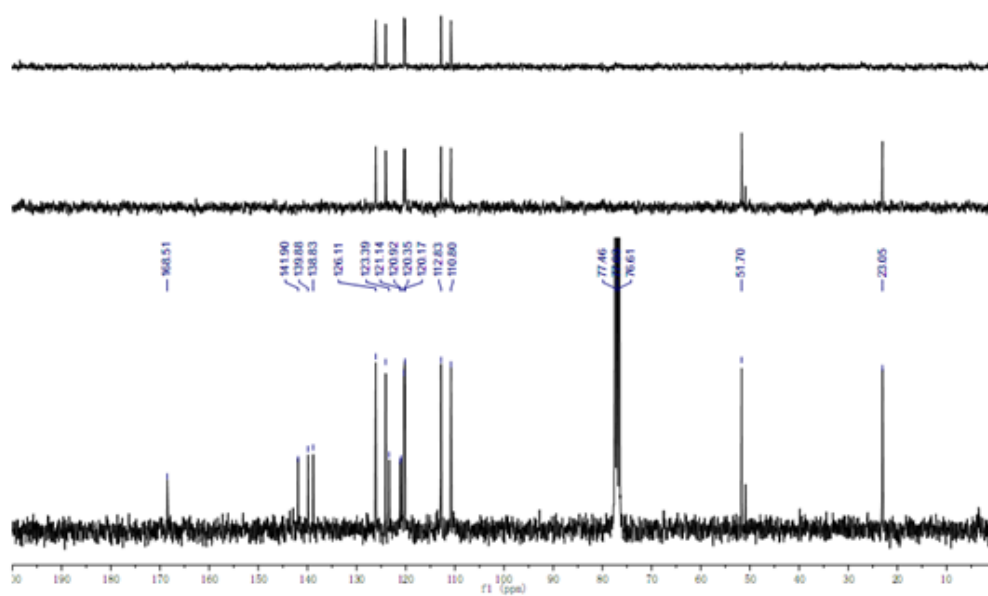

Figure S2.  $^{13}\text{C}$  NMR and DEPT spectra of **1** in  $\text{CDCl}_3$

YUNNAN UNIVERSITY ASCEND AVIIIHD600  
Mar22-2019  
HSQC CDCl3

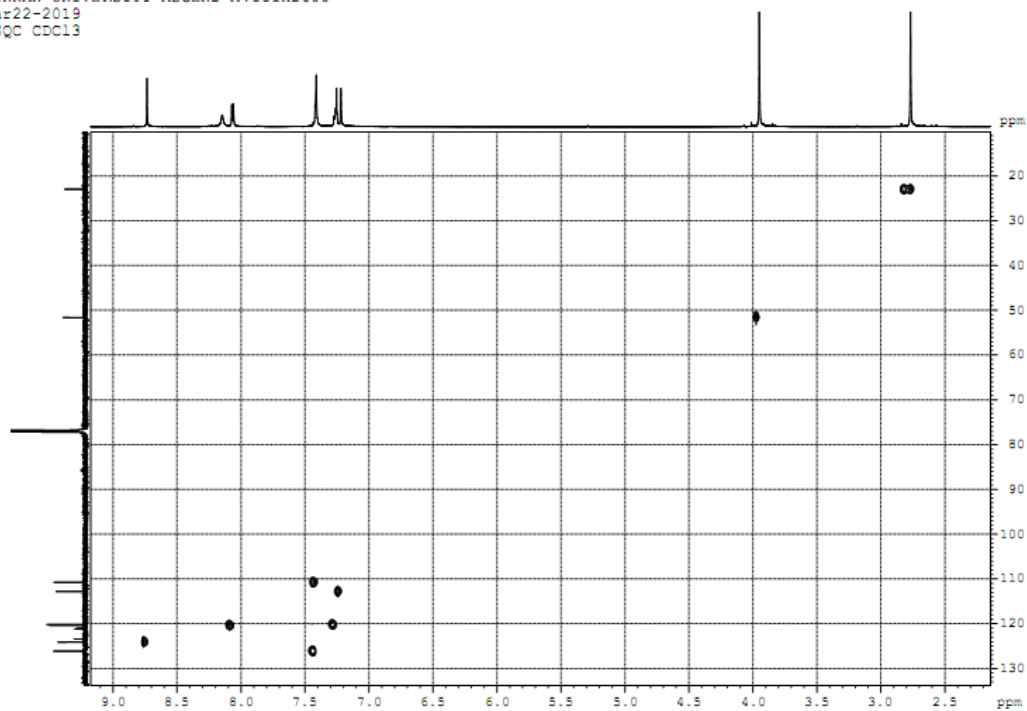

**Figure S3.** HSQC spectrum of **1** in CDCl<sub>3</sub>

YUNNAN UNIVERSITY ASCEND AVIIIHD600  
Mar22-2019  
HMBC CDCl3

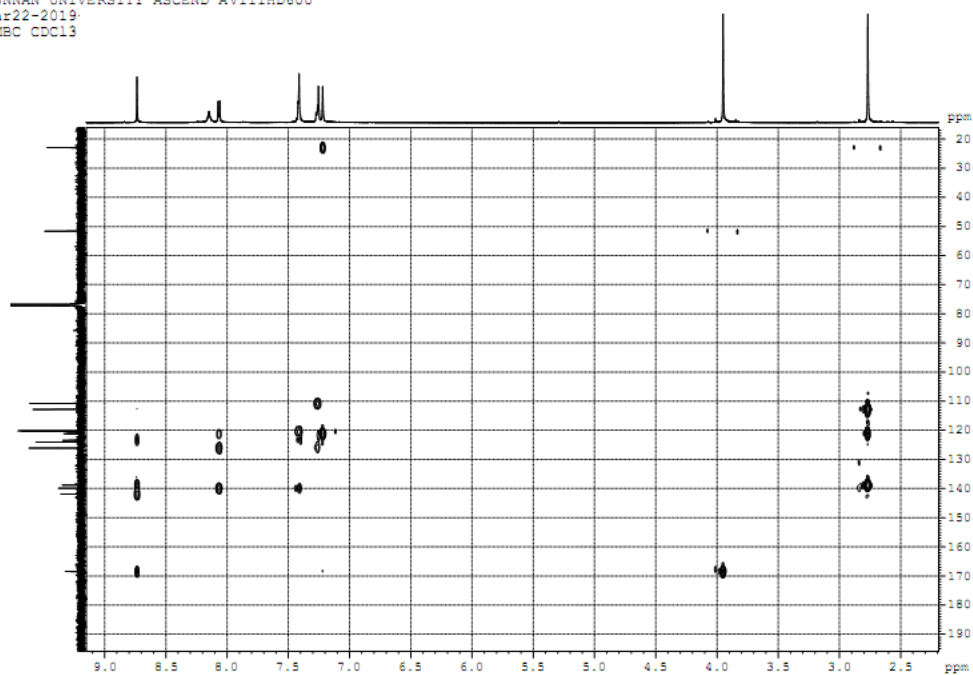

**Figure S4.** HMBC spectrum of **1** in CDCl<sub>3</sub>

YUNNAN UNIVERSITY ASCEND AVIIIHD600  
Mar22-2019  
COSY CDCl3

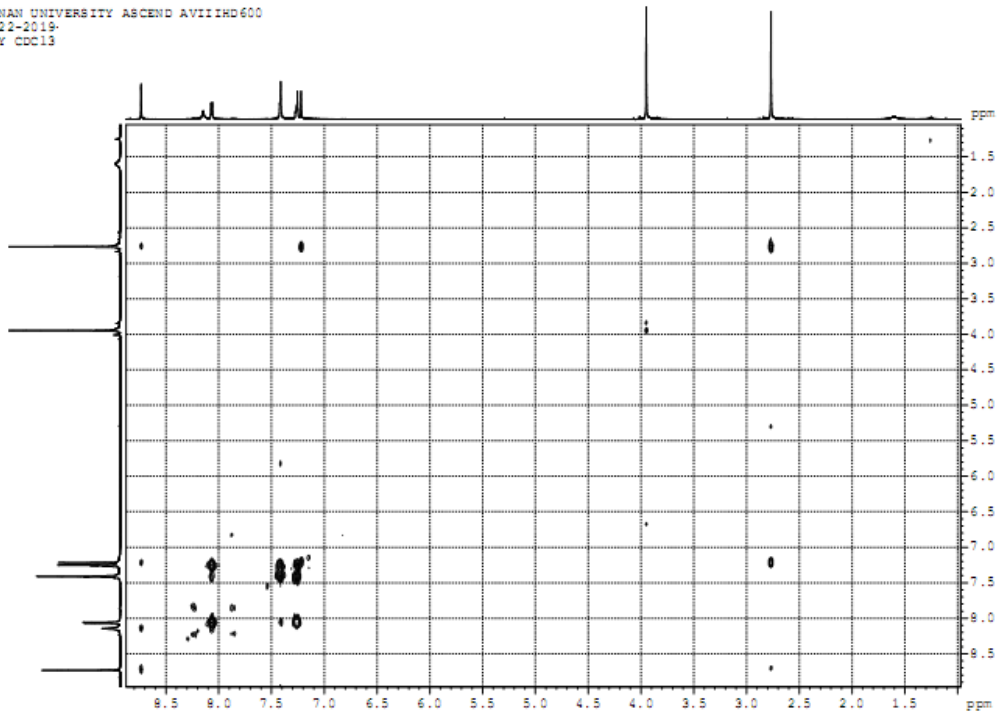

**Figure S5.**  $^1\text{H}$ - $^1\text{H}$  COSY spectrum of **1** in  $\text{CDCl}_3$

YUNNAN UNIVERSITY ASCEND AVIIIHD600  
ROESY CDCl3

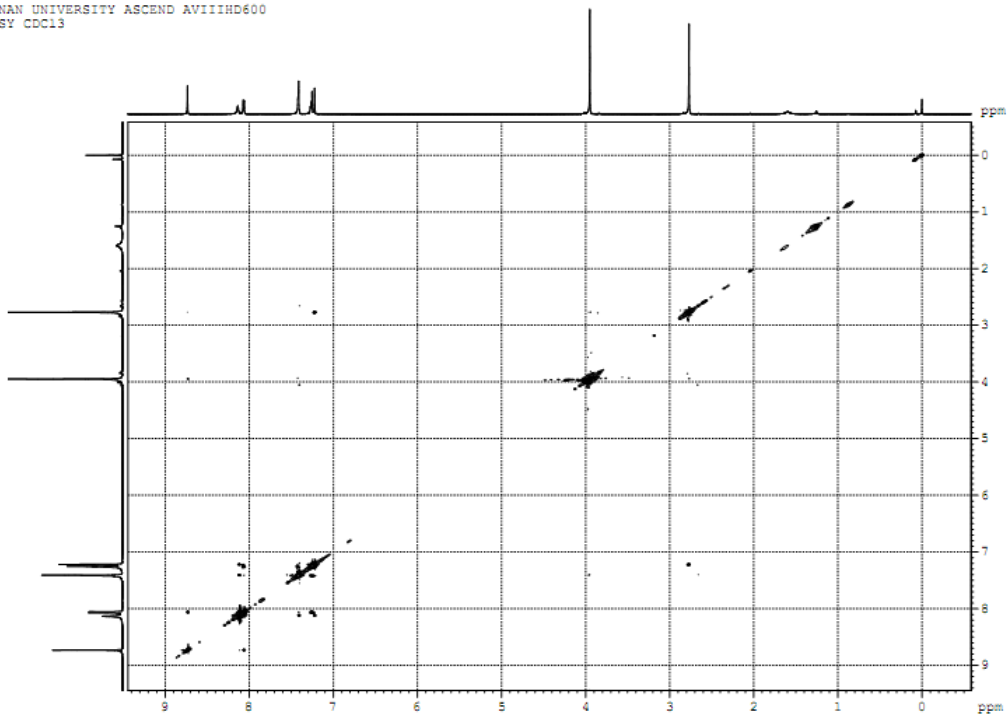

**Figure S6.** ROESY spectrum of **1** in  $\text{CDCl}_3$

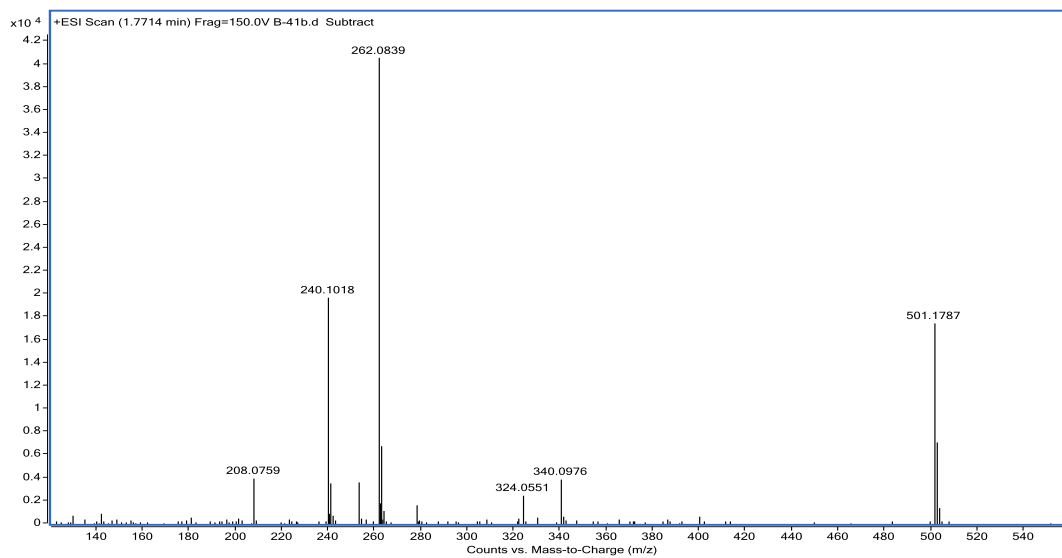

Figure S7. HRESIMS spectrum of **1**

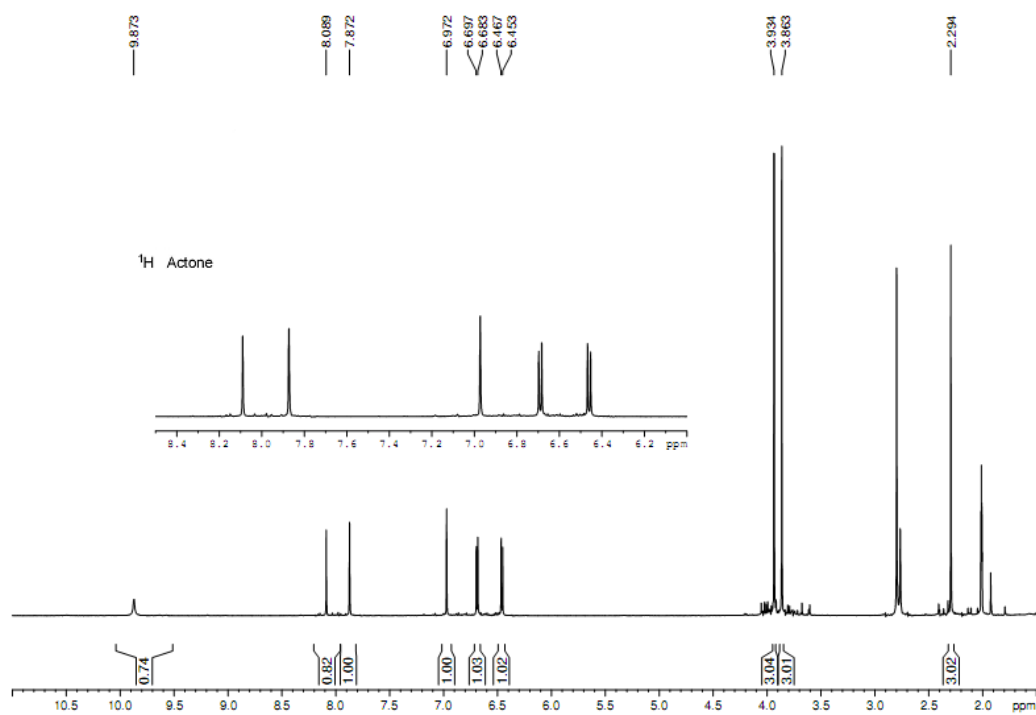

Figure S8. <sup>1</sup>H NMR spectrum of **2** in acetone-*d*<sub>6</sub>

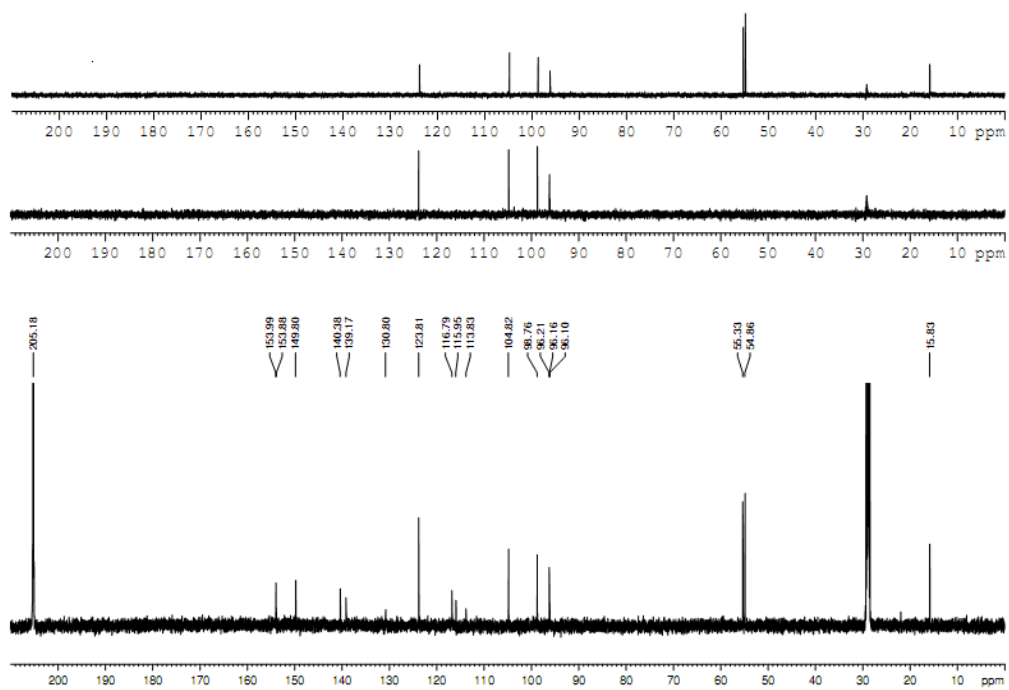

**Figure S9.**  $^{13}\text{C}$  NMR and DEPT spectra of **2** in acetone- $d_6$

YUNNAN UNIVERSITY ASCEND AVIIIHD600  
HSQC Acetone

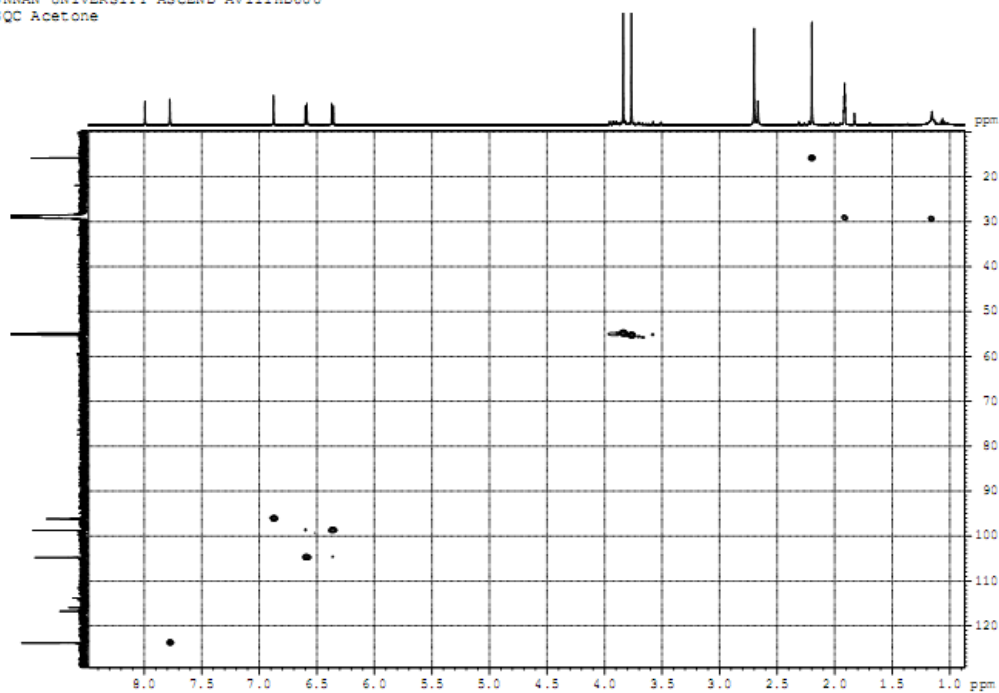

**Figure S10.** HSQC spectrum of **2** in acetone- $d_6$

YUNNAN UNIVERSITY ASCEND AVIIIHD600  
HMBC Acetone

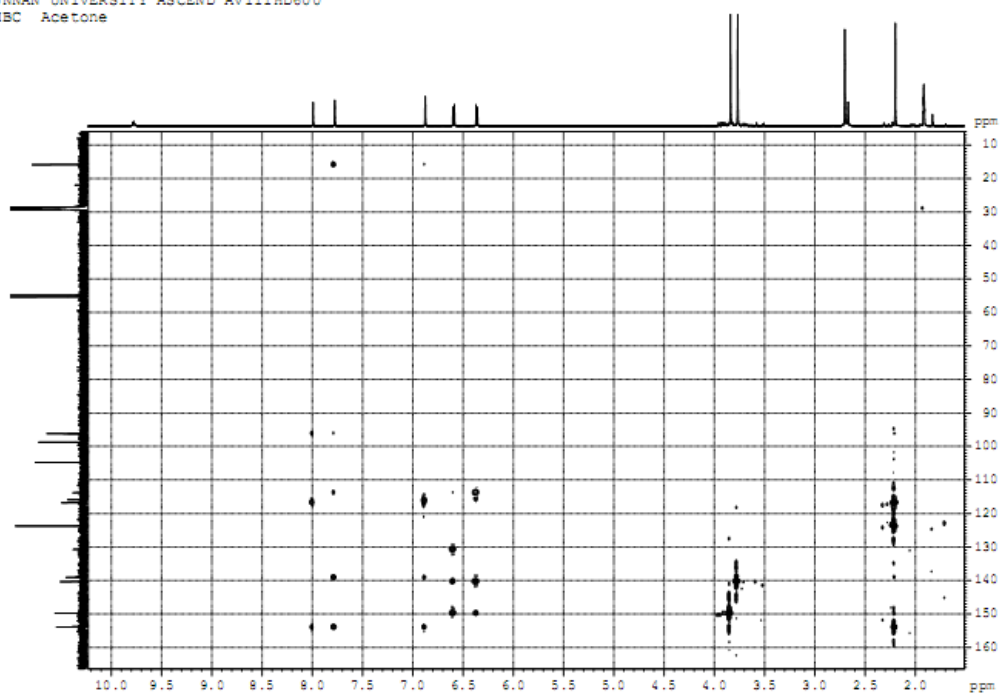

**Figure S11.** HMBC spectrum of **2** in acetone- $d_6$

YUNNAN UNIVERSITY ASCEND AVIIIHD600  
COSY Acetone

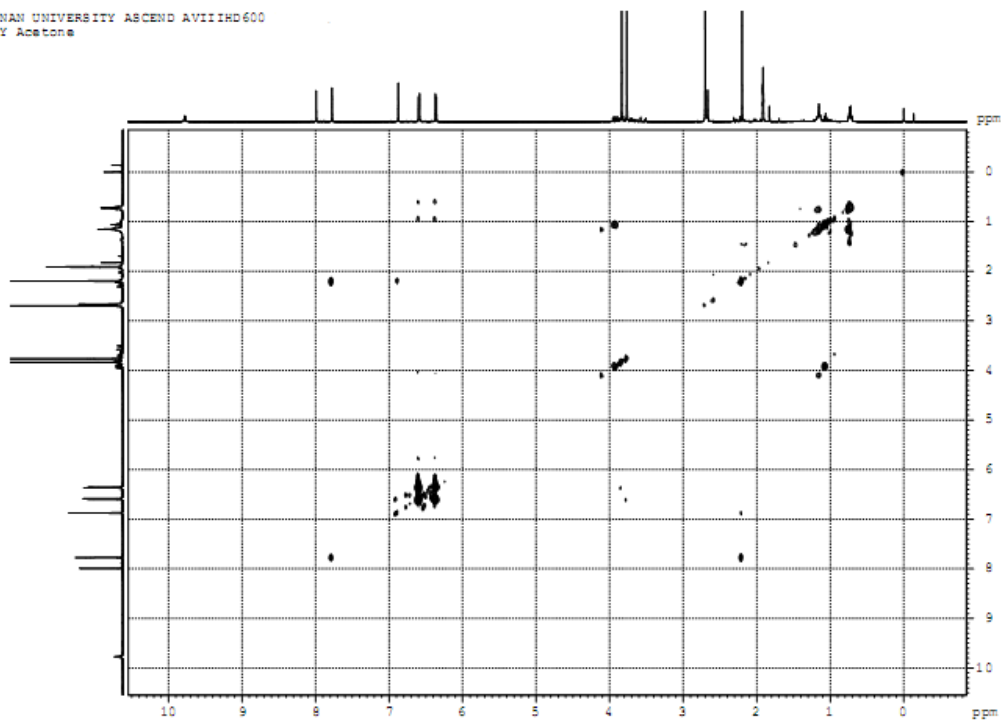

**Figure S12.**  $^1\text{H}$ - $^1\text{H}$  COSY spectrum of **2** in acetone- $d_6$

YUNNAN UNIVERSITY ASCEND AVIIHD600  
ROESY Acetone

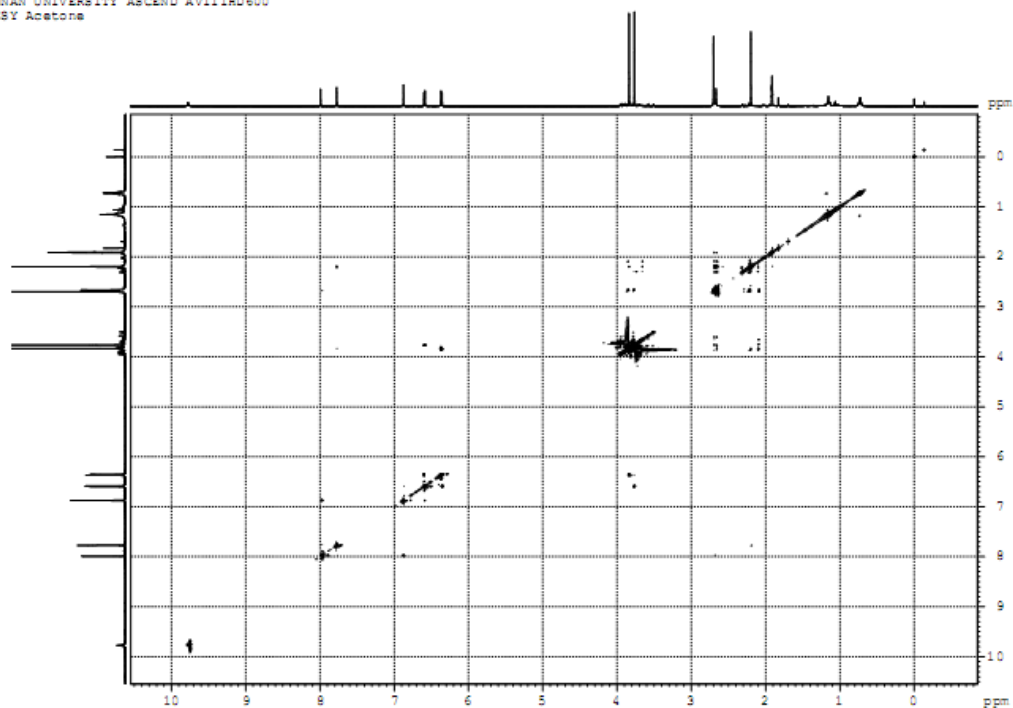

**Figure S13.** ROESY spectrum of **2** in acetone- $d_6$

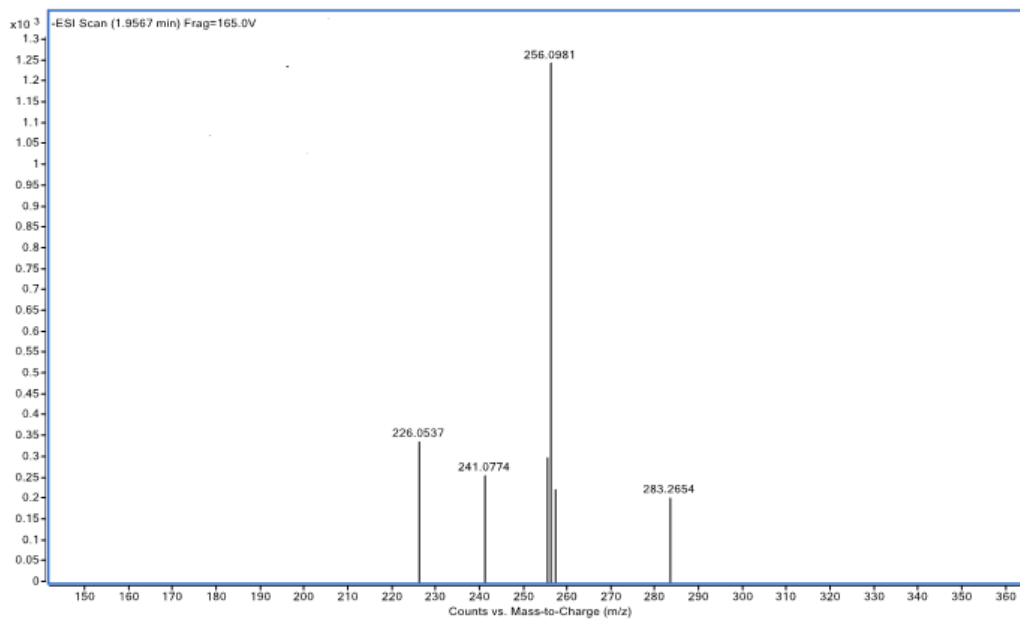

**Figure S14.** HRESIMS spectrum of **2**
